# Supplementary material
Source: publisher figshare collection journal article supplement (https://acs.figshare.com/ndownloader/files/3848131)
Supplement: Supplementary file 1 [file 3848131]

# Kinetics and Cluster Morphology Evolution of Shear-Driven Aggregation of Well Stabilized Colloids

*Xia Meng, Hua Wu\*, and Massimo Morbidelli\**

*Institute for Chemistry and Bioengineering, Department of Chemistry and Applied Biosciences, ETH Zurich, 8093 Zurich, Switzerland*

## Supporting Information

**Part A:** Applications of the generalized stability model to quantify the interaction energy barrier.

The colloidal systems used for this study were aqueous dispersions of polystyrene particles produced by emulsion polymerization with SDS (sodium dodecyl sulfate) as surfactant and KPS (potassium persulfate) as initiator. The radius of the particles is 21.5 nm by DLS measurements. The particle volume fraction ( $\phi$ ) of the original latex is 0.15. The aggregation systems with different  $\phi$  were prepared by direct dilution of the original latex with deionized water. This leads to changes in the SDS adsorption isotherm and the ionic strength at different  $\phi$  values and consequently to the changes in the interaction energy barrier ( $U_m$ ), which should be estimated. To this aim, the generalized stability model developed previously<sup>1</sup> has been applied, which accounts simultaneously for the interplays among three important physicochemical processes: adsorption equilibrium of surfactants, association equilibria of the ionic surfactants with counterions, and colloidal interactions. The following describes briefly the quantities that we considered in the generalized stability model:

1. The DLVO interactions.

According to the DLVO theory, the interaction energy between two colloidal particles,  $U$ , is the sum of the van der Waals attractive interaction ( $U_A$ ) and the electrostatic repulsive

interaction ( $U_R$ )

$$U = U_A + U_R \quad (1)$$

According to the Hamaker relationship, the expression for  $U_A$  is given by

$$U_A = -\frac{A_H}{6} \left[ \frac{2}{l^2 - 4} + \frac{2}{l^2} + \ln \left( 1 - \frac{4}{l^2} \right) \right] \quad (2)$$

where  $A_H$  is the Hamaker constant, and  $l = x/a$ . The modified Hogg-Healy-Fuersteneau expression is commonly used to describe the electrostatic repulsion<sup>2</sup>:

$$U_R = \frac{4\pi\epsilon_r\epsilon_0 a \psi^2}{l} \ln \{1 + \exp[-\kappa a(l-2)]\} \quad (3)$$

where  $\epsilon_r$  is the permittivity constant of the dispersion medium,  $\epsilon_0$  is the permittivity of vacuum,  $\psi$  is the surface potential which is obtained from zeta potential measurement<sup>3</sup> and  $\kappa$  is the reciprocal Debye length, which is defined as:

$$\kappa \equiv \left( N_A e^2 \sum_i c_i^b z_i^2 / \epsilon_r \epsilon_0 k_B T \right)^{1/2} \quad (4)$$

where  $N_A$  is the Avogadro constant,  $e$  is the electron charge, and  $c_i^b$  and  $z_i$  are the bulk concentration and charge valency of the  $i^{\text{th}}$  ion, respectively. The constants used in calculating  $U$  is listed below:

|                         |       |                         |
|-------------------------|-------|-------------------------|
| $A_H$                   | J     | $1.37 \times 10^{-204}$ |
| $N_A$                   | 1/mol | $6.022 \times 10^{23}$  |
| $k_B$                   | J/K   | $1.381 \times 10^{23}$  |
| $F$                     | C/mol | $9.65 \times 10^4$      |
| $e$                     | C     | $1.602 \times 10^{-19}$ |
| $T$                     | K     | 298                     |
| $\epsilon_r \epsilon_0$ | C/V/m | $6.950 \times 10^{-10}$ |

Where  $A_H$  value was estimated from the Lifshitz theory and taken from the literature.<sup>4</sup> In order

to estimate the DLVO interaction of the colloidal systems, several parameters has to be described:

## 2. Charges on the particle surface

The colloidal systems of this work contain the SDS surfactant, which adsorbs on the particle surfaces based on the adsorption isotherm and their dissociation leads to the formation of negative charges on the surface. Since the adsorption is reversible, the charges deriving from the surfactant molecules are referred to as mobile charges ( $E^-$ ). Besides, the polymer end group which comes from the initiator KPS contribute to the fixed charge ( $L^-$ ) on the particle surface.

## 3. Ionic strength

Since the colloidal systems which are used in the experiment are directly diluted from the original latex, the change of ionic species in the bulk liquid phase causes the redistribution of the ionic species, which in turn changes the association equilibria between the ionic surfactant adsorbed on the particle surface and the counter-ions in the bulk phase. Specifically, two sets of ionic specious SDS and KPS are considered in this calculation. The dissolved SDS in the bulk can be calculated according to the Langmuir-type adsorption isotherm of SDS on polystyrene nanoparticles:<sup>5</sup>

$$Vc_{\text{SDS}} + \frac{Kc_{\text{SDS}}}{1 + Kc_{\text{SDS}}} \Gamma_{\infty} S = Vc_0 \quad (5)$$

where  $K = 1.208 \times 10^5 \text{ cm}^3/\text{mol}$ ;  $\Gamma_{\infty} = 7.257 \times 10^{-10} \text{ mol}/\text{cm}^2$ ;  $c_{\text{SDS}}$  is the SDS concentration in the bulk,  $c_0$  is the total SDS concentration,  $S$  is the total surface area of the polystyrene particles in the latex, and  $V$  is the total volume.

During the emulsion polymerization, besides the part which initiates the free radical polymerization, KPS will also be hydrolysed according to the following reaction:

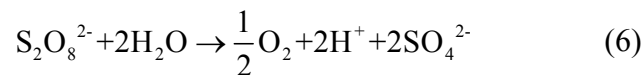

Consequently,  $H^+$  and  $SO_4^{2-}$  will be generated and contribute to the ionic strength.

Since the  $H^+$  concentration is significant in our system (pH= 2-3), in order to simplify the calculation, we only consider the association of  $H^+$  with  $SO_4^{2-}$  in the bulk and the  $-SO_4^-$  groups ( $L^-$  for fixed charge) on the polystyrene particle surface. The association of ions such as  $Na^+$  and  $K^+$  with anions is neglected.

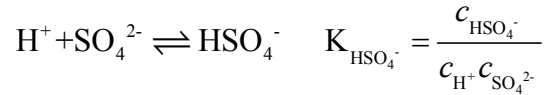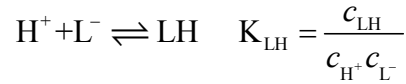

#### 4. Surface charge density and surface potential

As discussed above, two species contribute to the surface charge: the mobile charge from adsorbed surfactant ( $E^-$ ) and the fixed charge from polymer end group ( $L^-$ ). The total surface charge density:

$$\sigma_0 = \sigma_{0,E} + \sigma_{0,L}$$

Where  $\sigma_{0,E} = Fc_E^S$  and  $\sigma_{0,L} = Fc_L^S$ .  $c_E^S$  and  $c_L^S$  are the concentration of surfactant and the fixed end group on the particle surface (mol/m<sup>2</sup>), respectively. The surface potential of the particle is related to the surface charge by eq 7.<sup>6</sup>

$$\sigma_0 = -\{R_0 \sum c_j^b [\exp(-\frac{z_j e \psi_0}{k_B T}) - 1]\} \quad (7)$$

where  $R_0 = 2F\epsilon_0\epsilon_r k_B T / e$ ,  $\psi_0$  is the surface potential and  $c_j^b$  is the concentration of the  $j^{\text{th}}$  ion in the bulk.

In order to estimate the fixed charge density, we have mixed part of the original latex with a mixture of cationic and anionic exchange resins (Dowex MR-3, Sigma-Aldrich), according to a procedure described elsewhere.<sup>7</sup> This procedure can clean up all the SDS (adsorbed and dissolved), as well as all the other possible ions, leaving only the counterions ( $H^+$ ) of the surface

fixed charges. Then, we dilute this cleaned latex to  $\phi = 1.0 \times 10^{-4}$  with water in the presence of NaCl,  $c_{\text{NaCl}} = 0.01 \text{ mol/L}$ , which is considered as the model system. The  $\zeta$ -potential of the model system was measured using Zetasizer Nano instrument (Malvern, UK), equal to -45 mV, which is computed from the measured mobility using the Smoluchowski theory. Then, from the generalized stability model, we estimated the fixed charge of the polystyrene particles, whose value is  $0.012 \text{ C/m}^2$ . Sample No. 1 in Table S1 corresponds to the model system.

With this model system together with the above descriptions of all the quantities, we are able to describe well the colloidal interactions of all the systems used for the shear-driven aggregation, which are listed in Table S1.

**Table S1** Properties and colloidal interaction quantities of all the dispersions used in this work

| Sample No. | $\phi$    | $a$<br>nm | $\psi_0$<br>mV | $s$<br>$\text{C/m}^2$ | Total $I$<br>$\text{mol/m}^3$ | $l/k$<br>nm | $U_m$<br>$k_B T$ | $a_{\text{cr}}$<br>nm |
|------------|-----------|-----------|----------------|-----------------------|-------------------------------|-------------|------------------|-----------------------|
| 1          | $10^{-4}$ | 21.5      | -45.0          | 0.012                 | 20.0                          | 3.04        | 21               | 31.2                  |
| 2          | 0.02      | 21.5      | -158.8         | 0.083                 | 8.2                           | 4.77        | 348              | 79.7                  |
| 3          | 0.03      | 21.5      | -152.2         | 0.091                 | 13.3                          | 3.73        | 325              | 77.9                  |
| 4          | 0.05      | 21.5      | -143.1         | 0.098                 | 21.5                          | 2.93        | 280              | 74.2                  |
| 5          | 0.15      | 21.5      | -120.7         | 0.107                 | 57.2                          | 1.78        | 218              | 68.2                  |
| 6*         | 0.02      | 21.5      | -54.0          | 0.012                 | $1.3 \times 10^{-4}$          | 1202        | 42.2             | 39.5                  |

  

| Sample No. | $\phi$    | $c_{\text{SDS}}$<br>$\text{mol/m}^3$ | $c_{\text{H}^+}$<br>$\text{mol/m}^3$ | $c_{\text{Na}^+}$<br>$\text{mol/m}^3$ | $c_{\text{Cl}^-}$<br>$\text{mol/m}^3$ | $c_{\text{HSO}_4^-}$<br>$\text{mol/m}^3$ | $c_{\text{SO}_4^{2-}}$<br>$\text{mol/m}^3$ |
|------------|-----------|--------------------------------------|--------------------------------------|---------------------------------------|---------------------------------------|------------------------------------------|--------------------------------------------|
| 1          | $10^{-4}$ | 0.0                                  | $1.3 \times 10^{-4}$                 | 10.0                                  | 10.0                                  | 0.0                                      | 0.0                                        |
| 2          | 0.02      | 0.94                                 | 0.57                                 | 3.6                                   | 0.0                                   | 0.041                                    | 0.75                                       |
| 3          | 0.03      | 1.0                                  | 0.99                                 | 5.4                                   | 0.0                                   | 1.5                                      | 1.1                                        |
| 4          | 0.05      | 1.2                                  | 1.6                                  | 9.1                                   | 0.0                                   | 2.4                                      | 1.8                                        |
| 5          | 0.15      | 1.3                                  | 3.8                                  | 27.0                                  | 0.0                                   | 6.7                                      | 4.6                                        |
| 6*         | 0.02      | 0.0                                  | $1.3 \times 10^{-4}$                 | 0.0                                   | 0.0                                   | 0.0                                      | 0.0                                        |

\* is the latex after cleaning with ionic exchange resins.

## Part B: Scaling of the characteristic time

In shear-driven aggregation, the characteristic time may be represented by the inverse of the rate constant of the doublet formation:<sup>8</sup>

$$\frac{1}{k_{1,1}} \sim \frac{1}{\sqrt{(3\pi\alpha\mu\dot{\gamma}a^3 - U_m'')/k_B T}} e^{(U_m - 6\pi\alpha\mu\dot{\gamma}a^3)/k_B T} \quad (8)$$

where  $U_m''$  is the second derivative of the interaction energy at  $U_m$ . Now we estimate the  $U_m''$  value in order to further simplify the rate constant equation.

Consider the case of the DLVO interactions described above. The first derivative of  $U$  from eqs 2 and 3 reads:

$$U' = -\frac{A_H}{6} \left[ -\frac{4a^2 r}{(r^2 - 4a^2)^2} - \frac{4a^2}{r^3} + \frac{8a^2}{r^3 - 4a^2 r} \right] - \frac{4\pi\epsilon_r\epsilon_0 a^2 \psi^2}{r^2} \ln\{1 + \exp[-\kappa(r - 2a)]\} \\ - \frac{4\pi\epsilon_r\epsilon_0 a^2 \psi^2 \kappa}{r^2} \frac{1}{1 + \exp[\kappa(r - 2a)]} \quad (9)$$

At  $r = r_m$ ,  $U' = 0$  and  $U = U_m$ . The second derivative reads:

$$U'' = -\frac{A_H}{6} \left[ \frac{4a^2}{(r^3 - 8a^2 r + 16a^4/r)^2} (3r^2 - 8a^2 - 16a^4/r^2) \right. \\ \left. + \frac{12a^2}{r^4} - \frac{8a^2}{(r^3 - 4a^2 r)^2} (3r^2 - 4a^2) \right] + \frac{8\pi\epsilon_r\epsilon_0 a^2 \psi^2}{r^3} \ln\{1 + \exp[-\kappa(r - 2a)]\} \\ + \frac{8\pi\epsilon_r\epsilon_0 a^2 \psi^2 \kappa}{r^2} \frac{1}{1 + \exp[\kappa(r - 2a)]} + \frac{4\pi\epsilon_r\epsilon_0 a^2 \psi^2 \kappa^2}{r} \frac{\exp[\kappa(r - 2a)]}{\{1 + \exp[\kappa(r - 2a)]\}^2} \quad (10)$$

For the colloidal system used in this work, we have  $a = 23$  nm,  $\epsilon_r\epsilon_0 = 6.950 \times 10^{-10}$  C/V/m,  $1/\kappa = 9.62 \times 10^{-9}$  m, and  $A_H = 1.30 \times 10^{-20}$  J. With these values, considering the surface potential in the range of  $\psi \in [0.005, 0.1]$  V, we obtain from eq 10 that at  $r = r_m$ ,  $U_m'' \in [-2.07 \times 10^{-4}, -1.79]$ .

Instead, for the term,  $3\pi\alpha\mu\dot{\gamma}a^3$ , with the values,  $\alpha = 1/(3\pi)$ ,  $\mu = 0.001$  Pa·s and  $\dot{\gamma} = 10^6$  s<sup>-1</sup>,

we have  $3\pi\alpha\mu\dot{\gamma}a^3 = 1.22 \times 10^{-20}$ . Therefore, it can be concluded that in general, we have

$3\pi\alpha\mu\dot{\gamma}a^3 \ll -U_m''$ , and for given colloidal interactions, the rate constant, eq 8, can be simplified

as follows:

$$\frac{1}{k_{1,1}} \sim \frac{e^{U_m/k_B T}}{\sqrt{U_m''/k_B T}} e^{-6\pi\alpha\dot{\gamma}a^3/k_B T} \sim e^{-6\pi\alpha\dot{\gamma}a^3/k_B T} = e^{-\alpha(2Pe)} \quad (11)$$

where  $Pe [= 3\pi\mu\dot{\gamma}a^3 / k_B T]$  is the Peclet number.

## REFERENCES

- (1) Jia, Z. C.; Gauer, C.; Wu, H.; Morbidelli, M.; Chittofrati, A.; Apostolo, M. A generalized model for the stability of polymer colloids. *J. Colloid Interface Sci.* **2006**, *302* (1), 187-202.
- (2) Sader, J. E.; Carnie, S. L.; Chan, D. Y. C. Accurate analytic formulas for the double-Layer interaction between spheres. *J Colloid Interf Sci* **1995**, *171* (1), 46-54.
- (3) Hunter, R. J. *Zeta potential in colloid science*. Academic Press: London, 1981.
- (4) Prieve, D. C.; Russel, W. B. Simplified Predictions of Hamaker Constants from Lifshitz Theory. *J Colloid Interf Sci* **1988**, *125* (1), 1-13.
- (5) Brown, W.; Zhao, J. X. Adsorption of Sodium Dodecyl-Sulfate on Polystyrene Latex-Particles Using Dynamic Light-Scattering and Zeta-Potential Measurements. *Macromolecules* **1993**, *26* (11), 2711-2715.
- (6) Wu, H.; Lodi, S.; Morbidelli, M. Characterization of particle interaction energy through incipient turbulent aggregation. *J. Colloid Interface Sci.* **2002**, *256* (2), 304.
- (7) Wu, H.; Tsoutsoura, A.; Lattuada, M.; Zaccone, A.; Morbidelli, M. Effect of temperature on high shear-induced gelation of charge-stabilized colloids without adding electrolytes. *Langmuir* **2010**, *26* (4), 2761-2768.
- (8) Zaccone, A.; Wu, H.; Gentili, D.; Morbidelli, M. Theory of activated-rate processes under shear with application to shear-induced aggregation of colloids. *Phys. Rev. E* **2009**, *80* (5), 051404.
